# Supplementary material for: Ubiquitous strong electron–phonon coupling at the interface of FeSe/SrTiO3
Source: PubMed Central journal article supplement (PMC5311057; doi:10.1038/ncomms14468), 2017-02-10
Supplement: ncomms14468-s1.pdf [file ncomms14468-s1.pdf]

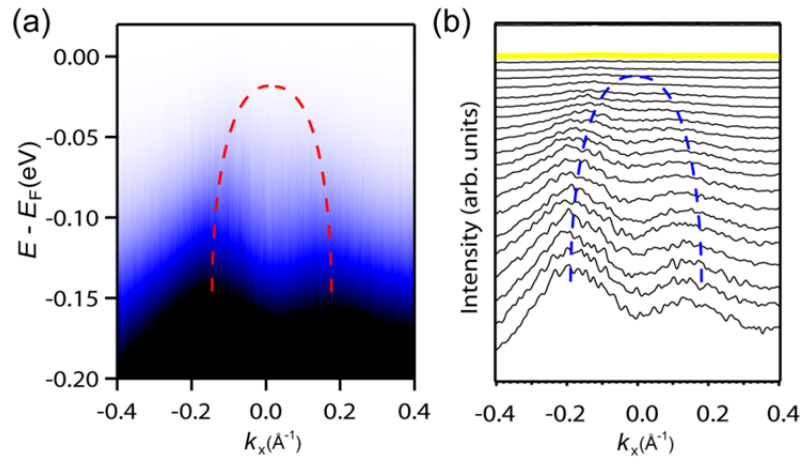

1

2 **Supplementary Figure 1**3 **The bands at the Gamma point.**

4 **(a)** Energy-momentum intensity map of the Gamma point. Dashed line shows the position of the  
5 hole band. **(b)** The momentum distribution curves of **(a)**. The yellow line shows the  $E_F$  level, and  
6 the blue line shows the position of the band. By fitting the momentum distribution curves  
7 (MDCs), we estimate the top of hole band is located at  $\sim 20$  meV below Fermi level.

8

9

10

11

12

13

14

15

16

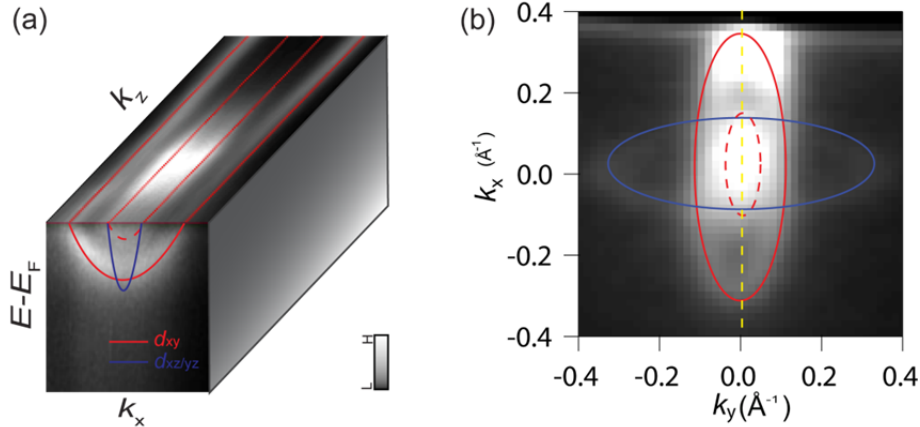

17

18 **Supplementary Figure 2**19 **The surface electronic structure of STO(110).**

20 (a) Energy-momentum intensity map of STO(110), the  $d_{xy}$  and  $d_{yz/xz}$  like bands are marked by the red and  
 21 blue curves respectively. Photon energy dependence shows no dispersion of along  $k_z$  as shown on the top  
 22 face. The three dimensional  $k_x$ - $k_z$ - $E$  ( $k_y=0$ ) APRES data of STO(110) with carrier density of  
 23  $6.0 \times 10^{13} \text{ cm}^{-2}$  (estimated from the Luttinger's volume). The carrier density associated with data  
 24 shown in this figure is relatively high but has not reached the saturation level – the doping level  
 25 beyond which carriers begin to spread into the bulk. The solid and dashed red parabolic curves  
 26 plotted on the front face are both  $d_{xy}$ -like bands. The one at higher binding energy is the main  
 27 band, while that at lower binding energy is the quantum well subband. The blue curve on the  
 28 front face marks a  $d_{xz/yz}$ -like band which has comparatively weak intensity due to unfavorable  
 29 ARPES matrix elements. We measure the  $k_z$  dependence by varying the photon energies from  
 30 45eV to 75eV. The resulting  $k_z$  dependence of the Fermi surface is shown on the top face.  
 31 Clearly the Fermi momenta show no measurable  $k_z$  dependence indicating the 2D nature of the  
 32 observed bands. (b) The Fermi surface map of STO(110) shows two cigar-shaped pockets crossing each  
 33 other. The solid curves show the Fermi surface of the main  $d_{xy}$  and  $d_{xz/yz}$  bands in the  $k_x$ - $k_y$  plane  
 34 at photon energy of 48eV. Two perpendicular cigar-shaped Fermi surfaces are observed. In the  
 35 same figure the dashed red curve marks the Fermi surface of the  $d_{xy}$  quantum well subband.

36

37

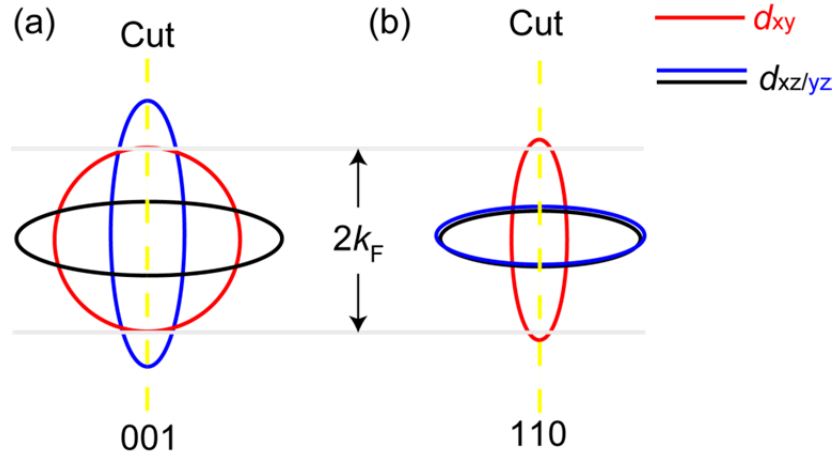

38

39 **Supplementary Figure 3**40 **The Schematic of Fermi surfaces at STO(001) and STO(110) with similar  $k_F$ .**

41 (a) The Fermi surface of STO(001) consists of circular  $d_{xy}$  orbital and two anisotropic  $d_{xz/yz}$  orbitals that  
 42 cross with each other. (b) The Fermi surface of STO(110) shows three similar elliptical pockets of  $d_{xy}$   
 43 and  $d_{xz/yz}$ . In the schematic we choose similar  $k_F$  of  $d_{xy}$  orbital for comparison. The area covered by all the  
 44 three orbitals in STO(001) is more than two times than that of STO(110).

45

46

47

48

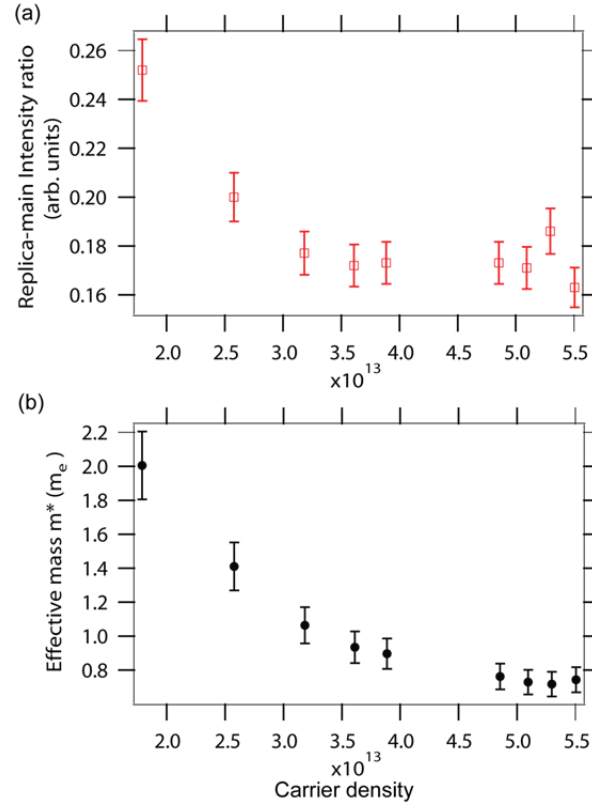

49

50 **Supplementary Figure 4**

51 **The intensity ratio between the replica and the main band and the effective mass as a function of**  
 52 **carrier density.**

53 **(a)** The evolution of replica intensities versus the carrier density. **(b)** The evolution of effective mass of  
 54 the main band versus the carrier density. We estimate the effective mass from the parabolic  $d_{xy}$   
 55 bands at different carrier densities. The result is  $2m_e$  at lower carrier density which amounts to an  
 56 effective mass enhancement  $m^*/m_0 \sim 3.3$ . At higher doping density the effective mass is  $0.8 m_e$   
 57 which gives  $m^*/m_0 \sim 1.3$ . If one attributes the change in the effective mass to the change in the  
 58 electron-phonon coupling strength this is consistent with the trend deduced from **(a)**. The error  
 59 bars in the figures are estimated from both the energy resolution and the fitting error. The counts  
 60 of band intensity is in the scale of  $10^3$ .

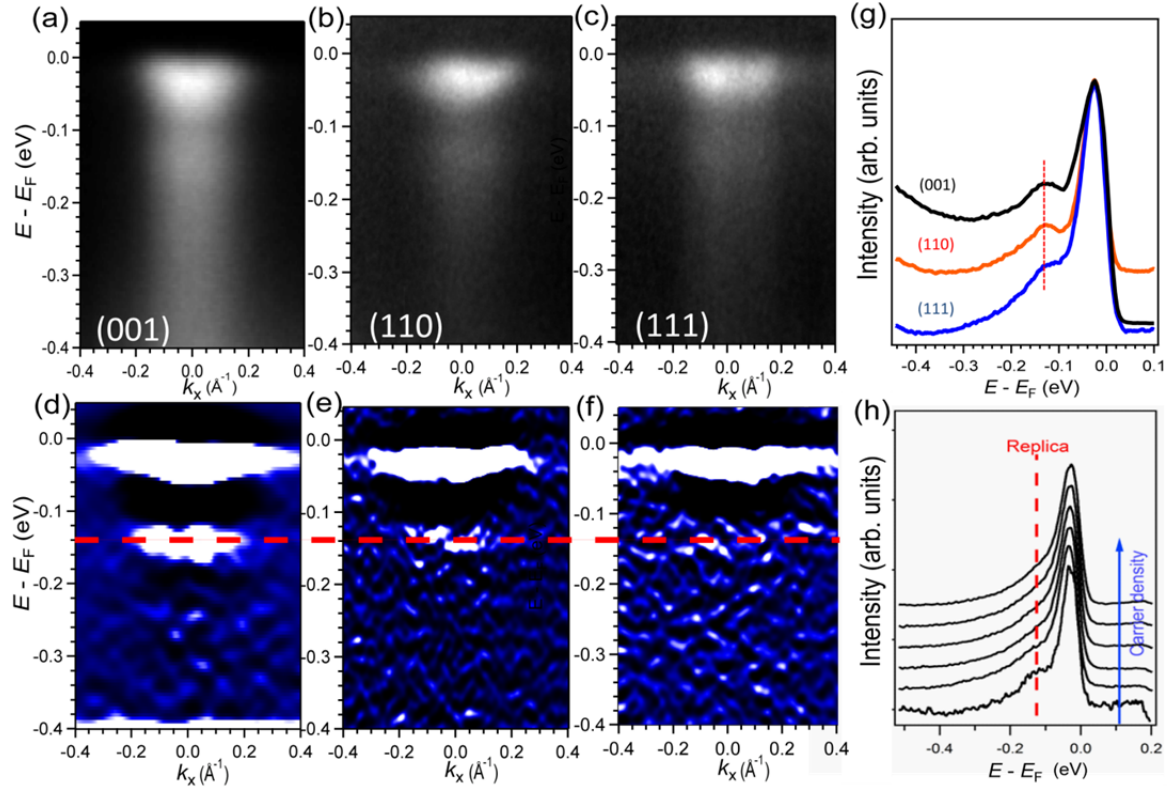

61

62 **Supplementary Figure 5**63 **The comparative study of STO surface (001), (110) and (111).**

64 (a)-(c). The raw data of the 2DEG band and the replica band at higher binding energy. (d)-(f) shows the  
 65 2<sup>nd</sup> energy derivative of corresponding upper images. We can observe the replica bands of all the three  
 66 surfaces, while the data quality of 110 and 111 are poorer than 001. In the energy distribution curves  
 67 (EDCs) shown at (g), we can see the separation between replica bands and main bands are  
 68 approximately same for all the three surfaces. (h) The EDCs at  $k_F$  as function of doping are  
 69 presented. When the photo doping move towards higher electron density, the strength of electron-phonon  
 70 coupling decreases. The ratio of replica band intensity to that of main band decreases as the doping  
 71 level increases. The trend is similar to what we present in the main text for STO(110) surface.

72

73

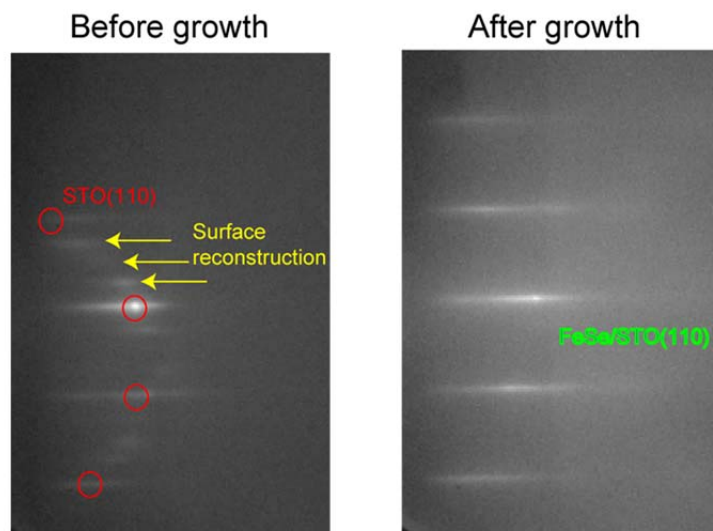

74

75 **Supplementary Figure 6**76 **The RHEED pattern before and after growth.**

77 Here we show the reflection high-energy electron diffraction (RHEED) patterns before and after  
78 growth. After degassing at 450°C for 1hour, we gradually increase the temperature to 830°C, at  
79 which a new RHEED pattern appears. We suggest this is due to the oxygen vacancies formed  
80 with the surface (4×1) reconstruction. After the growth of monolayer FeSe on top, we saw the  
81 conventional thin and straight pattern that indicates a good quality film.

82
